# Supplementary material for: Religiosity and Young Unmarried Women's Sexual and Contraceptive Behavior: New Evidence From a Longitudinal Panel of Young Adult Women
Source: Oxford University Press journal article supplement (doi:10.1215/00703370-9931820), 2022-04-20
Supplement: brooks_esm.pdf [file brooks_esm.pdf]

**Table A1.** Results of formal mediation analysis estimated with seemingly unrelated regressions with bootstrapped standard errors accounting for past behavior

|                                                          | Sexual Intercourse<br>(N = 39,806 weeks) |       |     | Hormonal Use<br>(N = 40,433 weeks) |       |     | Condom Only<br>(N = 11,645 weeks) |       |     |
|----------------------------------------------------------|------------------------------------------|-------|-----|------------------------------------|-------|-----|-----------------------------------|-------|-----|
|                                                          | $\beta$                                  | SE    | Sig | $\beta$                            | SE    | Sig | $\beta$                           | SE    | Sig |
| <b><u>Sexual and Contraceptive History Mediators</u></b> |                                          |       |     |                                    |       |     |                                   |       |     |
| Had sex before this week                                 |                                          |       |     | -.033                              | 0.001 | *** |                                   |       |     |
| Ever used hormonal methods before                        | -.011                                    | 0.001 | *** |                                    |       |     | .015                              | 0.002 | *** |
| Total indirect effect (through mediators)                | -.011                                    | 0.001 | *** | -.033                              | 0.001 | *** | .015                              | 0.002 | *** |
| Religiosity's direct effect                              | -.051                                    | 0.002 | *** | -.053                              | 0.003 | *** | .003                              | 0.006 |     |

Notes: Condom use is estimated in weeks when women are not using hormonal contraception. All models adjust for denomination and the full set of controls listed in Table 1 and use 100 bootstrap replications and bias corrected and accelerated confidence intervals. Predictors are lagged by one week.  $^{\dagger}p < .10$ ;  $*p < .05$ ;  $**p < .01$ ;  $***p < .001$

**Table A2.** Results of multinomial logistic regression estimating intercourse and contraceptive use jointly

|                                                  | No sex this week |        |      | Sex without contra. |      |      | Sex with condoms only |      |      | Sex with hormonal only |       |      | Sex with condoms & hormonal |          |      |
|--------------------------------------------------|------------------|--------|------|---------------------|------|------|-----------------------|------|------|------------------------|-------|------|-----------------------------|----------|------|
|                                                  | RRR              | SE     | Sig. | RRR                 | SE   | Sig. | RRR                   | SE   | Sig. | RRR                    | SE    | Sig. | RRR                         | SE       | Sig. |
| <i>Reference: No Sex this Week</i>               |                  |        |      |                     |      |      |                       |      |      |                        |       |      |                             |          |      |
| Religiosity (range, 1-5)                         | --               | --     |      | 0.60                | 0.10 | **   | 0.71                  | 0.08 | **   | 0.62                   | 0.09  | **   | 0.58                        | 0.08     | ***  |
| Constant                                         | --               | --     |      | 0.00                | 0.01 | *    | 0.01                  | 0.01 | **   | 0.03                   | 0.06  | †    | 17.54                       | 31.88    |      |
| <i>Reference: Sex without contraception</i>      |                  |        |      |                     |      |      |                       |      |      |                        |       |      |                             |          |      |
| Religiosity (range, 1-5)                         | 1.65             | 0.28   | **   | --                  | --   |      | 1.17                  | 0.19 |      | 1.03                   | 0.18  |      | 0.96                        | 0.18     |      |
| Constant                                         | 260.39           | 726.69 | *    | --                  | --   |      | 2.02                  | 5.96 |      | 7.69                   | 23.22 |      | 4566.97                     | 14317.48 | **   |
| <i>Reference: Sex with condom only</i>           |                  |        |      |                     |      |      |                       |      |      |                        |       |      |                             |          |      |
| Religiosity (range, 1-5)                         | 1.42             | 0.15   | **   | 0.86                | 0.14 |      | --                    | --   |      | 0.88                   | 0.13  |      | 0.82                        | 0.11     | †    |
| Constant                                         | 129.14           | 206.58 | **   | 0.50                | 1.47 |      | --                    | --   |      | 3.81                   | 8.19  |      | 2264.95                     | 4594.78  | ***  |
| <i>Reference: Sex with hormonal only</i>         |                  |        |      |                     |      |      |                       |      |      |                        |       |      |                             |          |      |
| Religiosity (range, 1-5)                         | 1.60             | 0.22   | **   | 0.97                | 0.17 |      | 1.13                  | 0.17 |      | --                     | --    |      | 0.93                        | 0.14     |      |
| Constant                                         | 33.87            | 64.01  | †    | 0.13                | 0.39 |      | 0.26                  | 0.56 |      | --                     | --    |      | 593.96                      | 1310.50  | **   |
| <i>Reference: Sex with condom &amp; hormonal</i> |                  |        |      |                     |      |      |                       |      |      |                        |       |      |                             |          |      |
| Religiosity (range, 1-5)                         | 1.72             | 0.22   | ***  | 1.04                | 0.19 |      | 1.22                  | 0.16 |      | 1.07                   | 0.16  |      | --                          | --       |      |
| Constant                                         | 0.06             | 0.10   |      | 0.00                | 0.00 | **   | 0.00                  | 0.00 | ***  | 0.00                   | 0.00  | **   | --                          | --       |      |
| Weeks                                            | 28,333           |        |      | 1,309               |      |      | 2,704                 |      |      | 3,414                  |       |      | 2,215                       |          |      |
| Women                                            | 454              |        |      | 25                  |      |      | 77                    |      |      | 63                     |       |      | 58                          |          |      |

Notes: Results presented as relative risk ratios. N = 37,975 weeks across 677 women. Model controls for women's denomination and demographic controls. Standard errors clustered by respondent. † $p < .10$ ; \* $p < .05$ ; \*\* $p < .01$ ; \*\*\* $p < .001$

**Table A3.** Results of linear probability models with random effects estimating sexual intercourse

|                                                        | Model 1 |      |      | Model 2 |      |      | Model 3 |      |      | Model 4 |      |      | Model 5 |      |      | Model 6 |      |      | Model 7 |      |      |
|--------------------------------------------------------|---------|------|------|---------|------|------|---------|------|------|---------|------|------|---------|------|------|---------|------|------|---------|------|------|
|                                                        | $\beta$ | SE   | Sig. |
| <b>Religiosity and Religion</b>                        |         |      |      |         |      |      |         |      |      |         |      |      |         |      |      |         |      |      |         |      |      |
| Religiosity (range, 1-5)                               | -0.06   | 0.01 | ***  | -0.05   | 0.01 | ***  | -0.05   | 0.01 | ***  | -0.06   | 0.01 | ***  | -0.05   | 0.01 | ***  | -0.01   | 0.01 |      | -0.05   | 0.01 | ***  |
| Denomination (ref: Other Christian)                    |         |      |      |         |      |      |         |      |      |         |      |      |         |      |      |         |      |      |         |      |      |
| Catholic                                               | 0.02    | 0.03 |      | 0.02    | 0.03 |      | 0.02    | 0.03 |      | 0.02    | 0.03 |      | 0.02    | 0.03 |      | 0.04    | 0.03 |      | 0.02    | 0.03 |      |
| Baptist                                                | -0.01   | 0.03 |      | -0.01   | 0.03 |      | -0.01   | 0.02 |      | -0.01   | 0.03 |      | -0.02   | 0.02 |      | 0.00    | 0.02 |      | -0.02   | 0.02 |      |
| Lutheran                                               | 0.00    | 0.05 |      | 0.00    | 0.05 |      | -0.01   | 0.05 |      | 0.00    | 0.05 |      | 0.00    | 0.05 |      | 0.00    | 0.05 |      | 0.00    | 0.05 |      |
| Methodist                                              | 0.03    | 0.05 |      | 0.03    | 0.04 |      | 0.04    | 0.04 |      | 0.03    | 0.04 |      | 0.03    | 0.04 |      | 0.02    | 0.04 |      | 0.03    | 0.04 |      |
| Evangelical                                            | -0.12   | 0.06 | *    | -0.11   | 0.06 | †    | -0.10   | 0.06 | †    | -0.11   | 0.06 | †    | -0.12   | 0.06 | *    | -0.08   | 0.06 |      | -0.11   | 0.06 | †    |
| Pentecostal                                            | -0.06   | 0.04 |      | -0.06   | 0.04 |      | -0.05   | 0.04 |      | -0.06   | 0.04 |      | -0.06   | 0.04 |      | -0.02   | 0.04 |      | -0.04   | 0.04 |      |
| Protestant                                             | -0.01   | 0.04 |      | 0.00    | 0.04 |      | 0.00    | 0.04 |      | -0.01   | 0.04 |      | -0.01   | 0.04 |      | 0.01    | 0.04 |      | -0.01   | 0.04 |      |
| <b>Mediators:</b>                                      |         |      |      |         |      |      |         |      |      |         |      |      |         |      |      |         |      |      |         |      |      |
| <b>Family Environment</b>                              |         |      |      |         |      |      |         |      |      |         |      |      |         |      |      |         |      |      |         |      |      |
| Parents' approval of sex (range, 0-5)                  |         |      |      | 0.01    | 0.00 | ***  |         |      |      |         |      |      |         |      |      |         |      |      |         |      |      |
| Parents at home after school (range, 1-5)              |         |      |      | 0.00    | 0.01 |      |         |      |      |         |      |      |         |      |      |         |      |      |         |      |      |
| Two parent household                                   |         |      |      | 0.01    | 0.02 |      |         |      |      |         |      |      |         |      |      |         |      |      |         |      |      |
| Lived with parent at baseline                          |         |      |      | -0.07   | 0.02 | ***  |         |      |      |         |      |      |         |      |      |         |      |      |         |      |      |
| Number of sex topics covered by parents (range, 0-5)   |         |      |      | 0.01    | 0.01 | *    |         |      |      |         |      |      |         |      |      |         |      |      |         |      |      |
| <b>Friend Environment</b>                              |         |      |      |         |      |      |         |      |      |         |      |      |         |      |      |         |      |      |         |      |      |
| Friends' approval of sex (range, 0-5)                  |         |      |      |         |      |      | 0.01    | 0.00 | ***  |         |      |      |         |      |      |         |      |      |         |      |      |
| Many or all friends are having sex                     |         |      |      |         |      |      | 0.05    | 0.01 | ***  |         |      |      |         |      |      |         |      |      |         |      |      |
| Friends' approval of sex no birth control (range, 0-5) |         |      |      |         |      |      | 0.01    | 0.00 | ***  |         |      |      |         |      |      |         |      |      |         |      |      |
| <b>Moral Order and Learned Competencies</b>            |         |      |      |         |      |      |         |      |      |         |      |      |         |      |      |         |      |      |         |      |      |
| Stop herself if aroused (range, 0-3)                   |         |      |      |         |      |      |         |      |      | -0.01   | 0.00 | ***  |         |      |      |         |      |      |         |      |      |
| Willingness to refuse sex (range, 0-5)                 |         |      |      |         |      |      |         |      |      | 0.00    | 0.00 | *    |         |      |      |         |      |      |         |      |      |
| Self-esteem (range, 0-4)                               |         |      |      |         |      |      |         |      |      | -0.02   | 0.02 |      |         |      |      |         |      |      |         |      |      |
| <b>Attitudes</b>                                       |         |      |      |         |      |      |         |      |      |         |      |      |         |      |      |         |      |      |         |      |      |
| Birth control is morally wrong (range, 0-4)            |         |      |      |         |      |      |         |      |      |         |      |      | 0.00    | 0.00 |      |         |      |      |         |      |      |
| Birth control takes too much planning (range, 0-4)     |         |      |      |         |      |      |         |      |      |         |      |      | 0.01    | 0.00 | *    |         |      |      |         |      |      |
| Disapproves of premarital sex (range, 1-5)             |         |      |      |         |      |      |         |      |      |         |      |      | -0.01   | 0.00 | ***  |         |      |      |         |      |      |
| Motherhood is most fulfilling role (range, 1-5)        |         |      |      |         |      |      |         |      |      |         |      |      | 0.00    | 0.00 | †    |         |      |      |         |      |      |
| Desire for pregnancy (range, 0-5)                      |         |      |      |         |      |      |         |      |      |         |      |      | 0.02    | 0.00 | ***  |         |      |      |         |      |      |
| <b>Emotions</b>                                        |         |      |      |         |      |      |         |      |      |         |      |      |         |      |      |         |      |      |         |      |      |
| Anticipated guilt after sex (range, 1-5)               |         |      |      |         |      |      |         |      |      |         |      |      |         |      |      | -0.07   | 0.01 | ***  |         |      |      |
| <b>Sexual and Contraceptive History</b>                |         |      |      |         |      |      |         |      |      |         |      |      |         |      |      |         |      |      |         |      |      |
| Ever used hormonal methods before                      |         |      |      |         |      |      |         |      |      |         |      |      |         |      |      |         |      |      | 0.10    | 0.01 | ***  |
| <b>Controls</b>                                        |         |      |      |         |      |      |         |      |      |         |      |      |         |      |      |         |      |      |         |      |      |
| Black                                                  | -0.01   | 0.02 |      | -0.02   | 0.02 |      | -0.02   | 0.02 |      | 0.00    | 0.02 |      | -0.01   | 0.02 |      | -0.04   | 0.02 | †    | -0.01   | 0.02 |      |
| Age                                                    | 0.01    | 0.00 | **   | 0.01    | 0.00 | *    | 0.00    | 0.00 |      | 0.01    | 0.00 | **   | 0.01    | 0.00 | **   | 0.01    | 0.00 | **   | -0.01   | 0.00 | *    |
| Mother was teenage mom                                 | 0.04    | 0.02 | †    | 0.03    | 0.02 |      | 0.03    | 0.02 |      | 0.04    | 0.02 | †    | 0.03    | 0.02 |      | 0.00    | 0.02 |      | 0.03    | 0.02 |      |
| Mother had some college or less                        | 0.04    | 0.02 | †    | 0.03    | 0.02 |      | 0.04    | 0.02 | †    | 0.04    | 0.02 | †    | 0.04    | 0.02 | †    | 0.04    | 0.02 | *    | 0.04    | 0.02 | *    |
| Relationship status (ref: no relationship)             |         |      |      |         |      |      |         |      |      |         |      |      |         |      |      |         |      |      |         |      |      |
| Engaged                                                | 0.39    | 0.01 | ***  | 0.39    | 0.01 | ***  | 0.39    | 0.01 | ***  | 0.39    | 0.01 | ***  | 0.39    | 0.01 | ***  | 0.39    | 0.01 | ***  | 0.39    | 0.01 | ***  |
| Special Relationship                                   | 0.37    | 0.00 | ***  | 0.37    | 0.00 | ***  | 0.37    | 0.00 | ***  | 0.37    | 0.00 | ***  | 0.37    | 0.00 | ***  | 0.37    | 0.00 | ***  | 0.37    | 0.00 | ***  |
| Relationship duration in weeks                         | 0.00    | 0.00 | *    | 0.00    | 0.00 | *    | 0.00    | 0.00 | **   | 0.00    | 0.00 | *    | 0.00    | 0.00 | *    | 0.00    | 0.00 | *    | 0.00    | 0.00 | *    |
| Enrolled in college                                    | -0.02   | 0.01 | ***  | -0.02   | 0.01 | ***  | -0.02   | 0.01 | **   | -0.02   | 0.01 | **   | -0.02   | 0.01 | **   | -0.02   | 0.01 | **   | -0.02   | 0.01 | ***  |
| Constant                                               | 0.18    | 0.07 | *    | 0.20    | 0.08 | **   | 0.21    | 0.07 | **   | 0.24    | 0.09 | **   | 0.17    | 0.07 | *    | 0.24    | 0.07 | ***  | 0.34    | 0.07 | ***  |
| sigma_u                                                | 0.22    |      |      | 0.22    |      |      | 0.21    |      |      | 0.22    |      |      | 0.22    |      |      | 0.21    |      |      | 0.22    |      |      |
| sigma_e                                                | 0.31    |      |      | 0.31    |      |      | 0.31    |      |      | 0.31    |      |      | 0.31    |      |      | 0.31    |      |      | 0.31    |      |      |
| rho                                                    | 0.22    |      |      | 0.22    |      |      | 0.21    |      |      | 0.22    |      |      | 0.22    |      |      | 0.21    |      |      | 0.22    |      |      |

Notes: N=39,806 weeks and 680 women. All predictors are lagged one week. †p<.10; \*p<.05; \*\*p<.01; \*\*\*p<.001

**Table A4.** Results of linear probability models with random effects estimating hormonal contraceptive use

|                                                        | Model 8 |      |      | Model 9 |      |      | Model 10 |      |      | Model 11 |      |      | Model 12 |      |      | Model 13 |      |      | Model 14 |      |      |
|--------------------------------------------------------|---------|------|------|---------|------|------|----------|------|------|----------|------|------|----------|------|------|----------|------|------|----------|------|------|
|                                                        | $\beta$ | SE   | Sig. | $\beta$ | SE   | Sig. | $\beta$  | SE   | Sig. | $\beta$  | SE   | Sig. | $\beta$  | SE   | Sig. | $\beta$  | SE   | Sig. | $\beta$  | SE   | Sig. |
| <b>Religiosity and Religion</b>                        |         |      |      |         |      |      |          |      |      |          |      |      |          |      |      |          |      |      |          |      |      |
| Religiosity (range, 1-5)                               | -0.07   | 0.02 | ***  | -0.07   | 0.02 | ***  | -0.06    | 0.02 | ***  | -0.07    | 0.02 | ***  | -0.06    | 0.02 | ***  | -0.04    | 0.02 | *    | -0.04    | 0.02 | *    |
| Denomination (ref: Other Christian)                    |         |      |      |         |      |      |          |      |      |          |      |      |          |      |      |          |      |      |          |      |      |
| Catholic                                               | -0.01   | 0.04 |      | -0.02   | 0.04 |      | -0.01    | 0.04 |      | 0.00     | 0.04 |      | -0.01    | 0.04 |      | 0.00     | 0.04 |      | -0.01    | 0.04 |      |
| Baptist                                                | -0.02   | 0.04 |      | -0.02   | 0.04 |      | -0.02    | 0.04 |      | -0.02    | 0.04 |      | -0.02    | 0.03 |      | -0.01    | 0.04 |      | -0.01    | 0.04 |      |
| Lutheran                                               | 0.05    | 0.07 |      | 0.03    | 0.07 |      | 0.05     | 0.07 |      | 0.04     | 0.07 |      | 0.04     | 0.07 |      | 0.05     | 0.07 |      | 0.05     | 0.07 |      |
| Methodist                                              | -0.03   | 0.07 |      | -0.04   | 0.06 |      | -0.03    | 0.06 |      | -0.02    | 0.07 |      | -0.03    | 0.06 |      | -0.04    | 0.06 |      | -0.01    | 0.06 |      |
| Evangelical                                            | -0.08   | 0.08 |      | -0.07   | 0.08 |      | -0.08    | 0.08 |      | -0.10    | 0.08 |      | -0.07    | 0.08 |      | -0.06    | 0.08 |      | -0.02    | 0.08 |      |
| Pentecostal                                            | -0.17   | 0.06 | **   | -0.17   | 0.06 | **   | -0.17    | 0.06 | **   | -0.18    | 0.06 | **   | -0.16    | 0.06 | **   | -0.14    | 0.06 | *    | -0.16    | 0.06 | *    |
| Protestant                                             | 0.00    | 0.05 |      | 0.00    | 0.05 |      | 0.01     | 0.05 |      | 0.01     | 0.05 |      | 0.01     | 0.05 |      | 0.02     | 0.05 |      | 0.01     | 0.05 |      |
| <b>Mediators:</b>                                      |         |      |      |         |      |      |          |      |      |          |      |      |          |      |      |          |      |      |          |      |      |
| <b>Family Environment</b>                              |         |      |      |         |      |      |          |      |      |          |      |      |          |      |      |          |      |      |          |      |      |
| Parents' approval of sex (range, 0-5)                  |         |      |      | 0.01    | 0.00 | **   |          |      |      |          |      |      |          |      |      |          |      |      |          |      |      |
| Parents at home after school (range, 1-5)              |         |      |      | 0.00    | 0.01 |      |          |      |      |          |      |      |          |      |      |          |      |      |          |      |      |
| Two parent household                                   |         |      |      | 0.07    | 0.03 | *    |          |      |      |          |      |      |          |      |      |          |      |      |          |      |      |
| Lived with parent at baseline                          |         |      |      | -0.02   | 0.03 |      |          |      |      |          |      |      |          |      |      |          |      |      |          |      |      |
| Number of sex topics covered by parents (range, 0-5)   |         |      |      | 0.03    | 0.01 | ***  |          |      |      |          |      |      |          |      |      |          |      |      |          |      |      |
| <b>Friend Environment</b>                              |         |      |      |         |      |      |          |      |      |          |      |      |          |      |      |          |      |      |          |      |      |
| Friends' approval of sex (range, 0-5)                  |         |      |      |         |      |      | 0.01     | 0.00 | ***  |          |      |      |          |      |      |          |      |      |          |      |      |
| Many or all friends are having sex                     |         |      |      |         |      |      | 0.03     | 0.01 | ***  |          |      |      |          |      |      |          |      |      |          |      |      |
| Friends' approval of sex no birth control (range, 0-5) |         |      |      |         |      |      | -0.01    | 0.00 | ***  |          |      |      |          |      |      |          |      |      |          |      |      |
| <b>Moral Order and Learned Competencies</b>            |         |      |      |         |      |      |          |      |      |          |      |      |          |      |      |          |      |      |          |      |      |
| Stop herself if aroused (range, 0-3)                   |         |      |      |         |      |      |          |      |      | 0.02     | 0.00 | ***  |          |      |      |          |      |      |          |      |      |
| Willingness to refuse sex (range, 0-5)                 |         |      |      |         |      |      |          |      |      | 0.00     | 0.00 |      |          |      |      |          |      |      |          |      |      |
| Self-esteem (range, 0-4)                               |         |      |      |         |      |      |          |      |      | 0.07     | 0.02 | **   |          |      |      |          |      |      |          |      |      |
| <b>Attitudes</b>                                       |         |      |      |         |      |      |          |      |      |          |      |      |          |      |      |          |      |      |          |      |      |
| Birth control is morally wrong (range, 0-4)            |         |      |      |         |      |      |          |      |      |          |      |      | -0.01    | 0.00 | **   |          |      |      |          |      |      |
| Birth control takes too much planning (range, 0-4)     |         |      |      |         |      |      |          |      |      |          |      |      | -0.01    | 0.00 | *    |          |      |      |          |      |      |
| Disapproves of premarital sex (range, 1-5)             |         |      |      |         |      |      |          |      |      |          |      |      | -0.01    | 0.00 | ***  |          |      |      |          |      |      |
| Motherhood is most fulfilling role (range, 1-5)        |         |      |      |         |      |      |          |      |      |          |      |      | 0.00     | 0.00 | *    |          |      |      |          |      |      |
| Desire for pregnancy (range, 0-5)                      |         |      |      |         |      |      |          |      |      |          |      |      | -0.02    | 0.00 | ***  |          |      |      |          |      |      |
| <b>Emotions</b>                                        |         |      |      |         |      |      |          |      |      |          |      |      |          |      |      |          |      |      |          |      |      |
| Anticipated guilt after sex (range, 1-5)               |         |      |      |         |      |      |          |      |      |          |      |      |          |      |      | -0.05    | 0.01 | ***  |          |      |      |
| <b>Sexual and Contraceptive History</b>                |         |      |      |         |      |      |          |      |      |          |      |      |          |      |      |          |      |      |          |      |      |
| Had sex before this week                               |         |      |      |         |      |      |          |      |      |          |      |      |          |      |      |          |      |      | 0.22     | 0.01 | ***  |
| <b>Controls</b>                                        |         |      |      |         |      |      |          |      |      |          |      |      |          |      |      |          |      |      |          |      |      |
| Black                                                  | -0.03   | 0.03 |      | -0.01   | 0.03 |      | -0.03    | 0.03 |      | -0.03    | 0.03 |      | -0.02    | 0.03 |      | -0.05    | 0.03 |      | -0.07    | 0.03 | *    |
| Age                                                    | 0.00    | 0.00 | *    | 0.00    | 0.00 |      | 0.00     | 0.00 |      | 0.00     | 0.00 | *    | 0.00     | 0.00 |      | 0.00     | 0.00 | *    | -0.01    | 0.00 | ***  |
| Mother was teenage mom                                 | 0.00    | 0.03 |      | 0.00    | 0.03 |      | 0.00     | 0.03 |      | 0.00     | 0.03 |      | 0.00     | 0.03 |      | -0.02    | 0.03 |      | -0.03    | 0.03 |      |
| Mother had some college or less                        | -0.05   | 0.03 |      | -0.05   | 0.03 | †    | -0.05    | 0.03 |      | -0.05    | 0.03 |      | -0.05    | 0.03 |      | -0.05    | 0.03 |      | -0.06    | 0.03 | *    |
| Relationship status (ref: no relationship)             |         |      |      |         |      |      |          |      |      |          |      |      |          |      |      |          |      |      |          |      |      |
| Engaged                                                | 0.08    | 0.01 | ***  | 0.08    | 0.01 | ***  | 0.08     | 0.01 | ***  | 0.08     | 0.01 | ***  | 0.08     | 0.01 | ***  | 0.08     | 0.01 | ***  | 0.07     | 0.01 | ***  |
| Special Relationship                                   | 0.06    | 0.00 | ***  | 0.06    | 0.00 | ***  | 0.06     | 0.00 | ***  | 0.06     | 0.00 | ***  | 0.06     | 0.00 | ***  | 0.06     | 0.00 | ***  | 0.05     | 0.00 | ***  |
| Relationship duration                                  | 0.00    | 0.00 | **   | 0.00    | 0.00 | **   | 0.00     | 0.00 | **   | 0.00     | 0.00 | **   | 0.00     | 0.00 | **   | 0.00     | 0.00 | **   | 0.00     | 0.00 | *    |
| Enrolled in college                                    | 0.03    | 0.01 | ***  | 0.03    | 0.01 | ***  | 0.04     | 0.01 | ***  | 0.03     | 0.01 | ***  | 0.03     | 0.01 | ***  | 0.04     | 0.01 | ***  | 0.04     | 0.01 | ***  |
| Constant                                               | 0.49    | 0.09 | ***  | 0.40    | 0.10 | ***  | 0.49     | 0.09 | ***  | 0.22     | 0.11 | †    | 0.58     | 0.08 | ***  | 0.53     | 0.09 | ***  | 0.55     | 0.09 | ***  |
| sigma_u                                                | 0.33    |      |      | 0.33    |      |      | 0.33     |      |      | 0.33     |      |      | 0.31     |      |      | 0.33     |      |      | 0.32     |      |      |
| sigma_e                                                | 0.28    |      |      | 0.28    |      |      | 0.28     |      |      | 0.28     |      |      | 0.28     |      |      | 0.28     |      |      | 0.28     |      |      |
| rho                                                    | 0.58    |      |      | 0.57    |      |      | 0.57     |      |      | 0.57     |      |      | 0.55     |      |      | 0.57     |      |      | 0.57     |      |      |

Notes: N=40,433 weeks and 681 women. All predictors are lagged one week. †p<.10; \*p < .05; \*\*p < .01; \*\*\*p < .001

**Table A5.** Results of linear probability models with random effects estimating condom use in weeks when women had intercourse but did not use a hormonal method

|                                                        | Model 15 |      |      | Model 16 |      |      | Model 17 |      |      | Model 18 |      |      | Model 19 |      |      | Model 20 |      |      | Model 21 |      |      |
|--------------------------------------------------------|----------|------|------|----------|------|------|----------|------|------|----------|------|------|----------|------|------|----------|------|------|----------|------|------|
|                                                        | $\beta$  | SE   | Sig. |
| <b>Religiosity and Religion</b>                        |          |      |      |          |      |      |          |      |      |          |      |      |          |      |      |          |      |      |          |      |      |
| Religiosity (range, 1-5)                               | 0.04     | 0.02 |      | 0.04     | 0.02 | †    | 0.03     | 0.02 |      | 0.04     | 0.02 |      | 0.03     | 0.02 |      | 0.02     | 0.02 |      | 0.03     | 0.02 |      |
| <b>Denomination (ref: Other Christian)</b>             |          |      |      |          |      |      |          |      |      |          |      |      |          |      |      |          |      |      |          |      |      |
| Catholic                                               | 0.03     | 0.04 |      | 0.03     | 0.04 |      | 0.03     | 0.04 |      | 0.03     | 0.04 |      | 0.03     | 0.04 |      | 0.02     | 0.04 |      | 0.04     | 0.04 |      |
| Baptist                                                | -0.04    | 0.04 |      | -0.04    | 0.04 |      | -0.04    | 0.04 |      | -0.04    | 0.04 |      | -0.03    | 0.04 |      | -0.04    | 0.04 |      | -0.03    | 0.04 |      |
| Lutheran                                               | -0.05    | 0.08 |      | -0.04    | 0.08 |      | -0.05    | 0.08 |      | -0.05    | 0.08 |      | -0.05    | 0.08 |      | -0.05    | 0.08 |      | -0.03    | 0.07 |      |
| Methodist                                              | -0.15    | 0.08 | *    | -0.14    | 0.08 | †    | -0.14    | 0.08 | †    | -0.15    | 0.08 | †    | -0.14    | 0.08 | †    | -0.13    | 0.08 | †    | -0.12    | 0.07 | †    |
| Evangelical                                            | -0.01    | 0.11 |      | -0.01    | 0.11 |      | 0.01     | 0.11 |      | 0.00     | 0.11 |      | 0.00     | 0.11 |      | -0.01    | 0.11 |      | 0.03     | 0.10 |      |
| Pentecostal                                            | 0.12     | 0.08 |      | 0.12     | 0.08 |      | 0.13     | 0.08 | †    | 0.13     | 0.08 |      | 0.11     | 0.08 |      | 0.10     | 0.08 |      | 0.08     | 0.07 |      |
| Protestant                                             | -0.05    | 0.06 |      | -0.04    | 0.06 |      | -0.04    | 0.06 |      | -0.04    | 0.06 |      | -0.04    | 0.06 |      | -0.04    | 0.06 |      | -0.04    | 0.06 |      |
| <b>Mediators:</b>                                      |          |      |      |          |      |      |          |      |      |          |      |      |          |      |      |          |      |      |          |      |      |
| <b>Family Environment</b>                              |          |      |      |          |      |      |          |      |      |          |      |      |          |      |      |          |      |      |          |      |      |
| Parents' approval of sex (range, 0-5)                  |          |      |      | 0.00     | 0.00 |      |          |      |      |          |      |      |          |      |      |          |      |      |          |      |      |
| Parents at home after school (range, 1-5)              |          |      |      | -0.01    | 0.01 |      |          |      |      |          |      |      |          |      |      |          |      |      |          |      |      |
| Two parent household                                   |          |      |      | -0.04    | 0.03 |      |          |      |      |          |      |      |          |      |      |          |      |      |          |      |      |
| Lived with parent at baseline                          |          |      |      | 0.01     | 0.03 |      |          |      |      |          |      |      |          |      |      |          |      |      |          |      |      |
| Number of sex topics covered by parents range, (0-5)   |          |      |      | -0.01    | 0.01 | †    |          |      |      |          |      |      |          |      |      |          |      |      |          |      |      |
| <b>Friend Environment</b>                              |          |      |      |          |      |      |          |      |      |          |      |      |          |      |      |          |      |      |          |      |      |
| Friends' approval of sex (range, 0-5)                  |          |      |      |          |      |      | -0.01    | 0.00 | †    |          |      |      |          |      |      |          |      |      |          |      |      |
| Many or all friends are having sex                     |          |      |      |          |      |      | -0.01    | 0.01 |      |          |      |      |          |      |      |          |      |      |          |      |      |
| Friends' approval of sex no birth control (range, 0-5) |          |      |      |          |      |      | 0.02     | 0.00 | ***  |          |      |      |          |      |      |          |      |      |          |      |      |
| <b>Moral Order and Learned Competencies</b>            |          |      |      |          |      |      |          |      |      |          |      |      |          |      |      |          |      |      |          |      |      |
| Stop herself if aroused (range, 0-3)                   |          |      |      |          |      |      |          |      |      | 0.00     | 0.00 |      |          |      |      |          |      |      |          |      |      |
| Willingness to refuse sex (range, 0-5)                 |          |      |      |          |      |      |          |      |      | -0.01    | 0.00 | *    |          |      |      |          |      |      |          |      |      |
| Self-esteem (range, 0-4)                               |          |      |      |          |      |      |          |      |      | 0.00     | 0.03 |      |          |      |      |          |      |      |          |      |      |
| <b>Attitudes</b>                                       |          |      |      |          |      |      |          |      |      |          |      |      |          |      |      |          |      |      |          |      |      |
| Birth control is morally wrong (range, 0-4)            |          |      |      |          |      |      |          |      |      |          |      |      | 0.01     | 0.01 |      |          |      |      |          |      |      |
| Birth control takes too much planning (range, 0-4)     |          |      |      |          |      |      |          |      |      |          |      |      | 0.00     | 0.01 |      |          |      |      |          |      |      |
| Disapproves of premarital sex (range, 1-5)             |          |      |      |          |      |      |          |      |      |          |      |      | 0.01     | 0.00 | **   |          |      |      |          |      |      |
| Motherhood is most fulfilling role (range, 1-5)        |          |      |      |          |      |      |          |      |      |          |      |      | -0.01    | 0.00 | †    |          |      |      |          |      |      |
| Desire for pregnancy (range, 0-5)                      |          |      |      |          |      |      |          |      |      |          |      |      | -0.03    | 0.00 | ***  |          |      |      |          |      |      |
| <b>Emotions</b>                                        |          |      |      |          |      |      |          |      |      |          |      |      |          |      |      |          |      |      |          |      |      |
| Anticipated guilt after sex (range, 1-5)               |          |      |      |          |      |      |          |      |      |          |      |      |          |      |      | 0.04     | 0.01 | **   |          |      |      |
| <b>Sexual and Contraceptive History</b>                |          |      |      |          |      |      |          |      |      |          |      |      |          |      |      |          |      |      |          |      |      |
| Ever used hormonal methods before                      |          |      |      |          |      |      |          |      |      |          |      |      |          |      |      |          |      |      | -0.26    | 0.01 | ***  |
| <b>Controls</b>                                        |          |      |      |          |      |      |          |      |      |          |      |      |          |      |      |          |      |      |          |      |      |
| Black                                                  | 0.09     | 0.04 | *    | 0.09     | 0.04 | *    | 0.09     | 0.04 | *    | 0.09     | 0.04 | *    | 0.09     | 0.04 | *    | 0.11     | 0.04 | **   | 0.09     | 0.03 | **   |
| Age                                                    | -0.02    | 0.00 | ***  | -0.02    | 0.01 | ***  | -0.02    | 0.01 | ***  | -0.02    | 0.00 | ***  | -0.02    | 0.00 | ***  | -0.02    | 0.00 | ***  | 0.01     | 0.01 | *    |
| Mother was teenage mom                                 | 0.02     | 0.03 |      | 0.02     | 0.03 |      | 0.02     | 0.03 |      | 0.02     | 0.03 |      | 0.03     | 0.03 |      | 0.04     | 0.03 |      | 0.03     | 0.03 |      |
| Mother had some college or less                        | -0.01    | 0.04 |      | 0.00     | 0.04 |      | -0.01    | 0.04 |      | -0.01    | 0.04 |      | 0.00     | 0.04 |      | -0.02    | 0.04 |      | -0.03    | 0.03 |      |
| <b>Relationship status</b>                             |          |      |      |          |      |      |          |      |      |          |      |      |          |      |      |          |      |      |          |      |      |
| Engaged                                                | -0.05    | 0.02 | **   | -0.05    | 0.02 | **   | -0.05    | 0.02 | **   | -0.05    | 0.02 | **   | -0.04    | 0.02 | †    | -0.05    | 0.02 | **   | -0.05    | 0.02 | **   |
| Special Relationship                                   | -0.03    | 0.01 | †    | -0.03    | 0.01 | †    | -0.03    | 0.01 | †    | -0.03    | 0.01 | †    | -0.03    | 0.01 | †    | -0.03    | 0.01 | †    | -0.03    | 0.01 | †    |
| Relationship duration in weeks                         | 0.00     | 0.00 | **   | 0.00     | 0.00 | **   | 0.00     | 0.00 | **   | 0.00     | 0.00 | **   | 0.00     | 0.00 | **   | 0.00     | 0.00 | *    | 0.00     | 0.00 | ***  |
| Enrolled in college                                    | -0.01    | 0.01 |      | -0.01    | 0.01 |      | -0.01    | 0.01 |      | -0.01    | 0.01 |      | -0.01    | 0.01 |      | -0.01    | 0.01 |      | 0.00     | 0.01 |      |
| Constant                                               | 0.57     | 0.13 | ***  | 0.65     | 0.14 | ***  | 0.61     | 0.13 | ***  | 0.59     | 0.16 | ***  | 0.60     | 0.13 | ***  | 0.54     | 0.13 | ***  | 0.19     | 0.12 |      |
| sigma_u                                                | 0.32     |      |      | 0.32     |      |      | 0.32     |      |      | 0.32     |      |      | 0.31     |      |      | 0.32     |      |      | 0.28     |      |      |
| sigma_e                                                | 0.31     |      |      | 0.31     |      |      | 0.31     |      |      | 0.31     |      |      | 0.31     |      |      | 0.31     |      |      | 0.31     |      |      |
| rho                                                    | 0.51     |      |      | 0.51     |      |      | 0.51     |      |      | 0.51     |      |      | 0.51     |      |      | 0.51     |      |      | 0.46     |      |      |

Notes: N=11,645 weeks and 528 women. All predictors are lagged one week. †p<.10; \*p < .05; \*\*p < .01; \*\*\*p < .001
